# Supplementary material for: High-resolution asymmetric structure of a Fab–virus complex reveals overlap with the receptor binding site
Source: PubMed Central journal article supplement — Proc Natl Acad Sci U S A. 2021 May 31;118(23):e2025452118. doi: 10.1073/pnas.2025452118 (PMC8201801; doi:10.1073/pnas.2025452118), 2021-05-31
Supplement: pnas.2025452118.sapp.pdf [file pnas.2025452118.sapp.pdf]

## **Supplementary Information for**

High resolution asymmetric structure of a Fab-virus complex reveals overlap with the receptor binding site

Daniel J. Goetschius, Samantha R. Hartmann, Lindsey J. Organtini, Heather Callaway, Kai Huang, Carol M. Bator, Robert E. Ashley, Alexander M. Makhov, James F. Conway, Colin R. Parrish, Susan L. Hafenstein

Susan L. Hafenstein  
Email: [shafenstein@psu.edu](mailto:shafenstein@psu.edu)

### **This PDF file includes:**

Figures S1 to S7  
Tables S1 to S3  
Legends for Movies S1 to S2

### **Other supplementary materials for this manuscript include the following:**

Movies S1 to S2

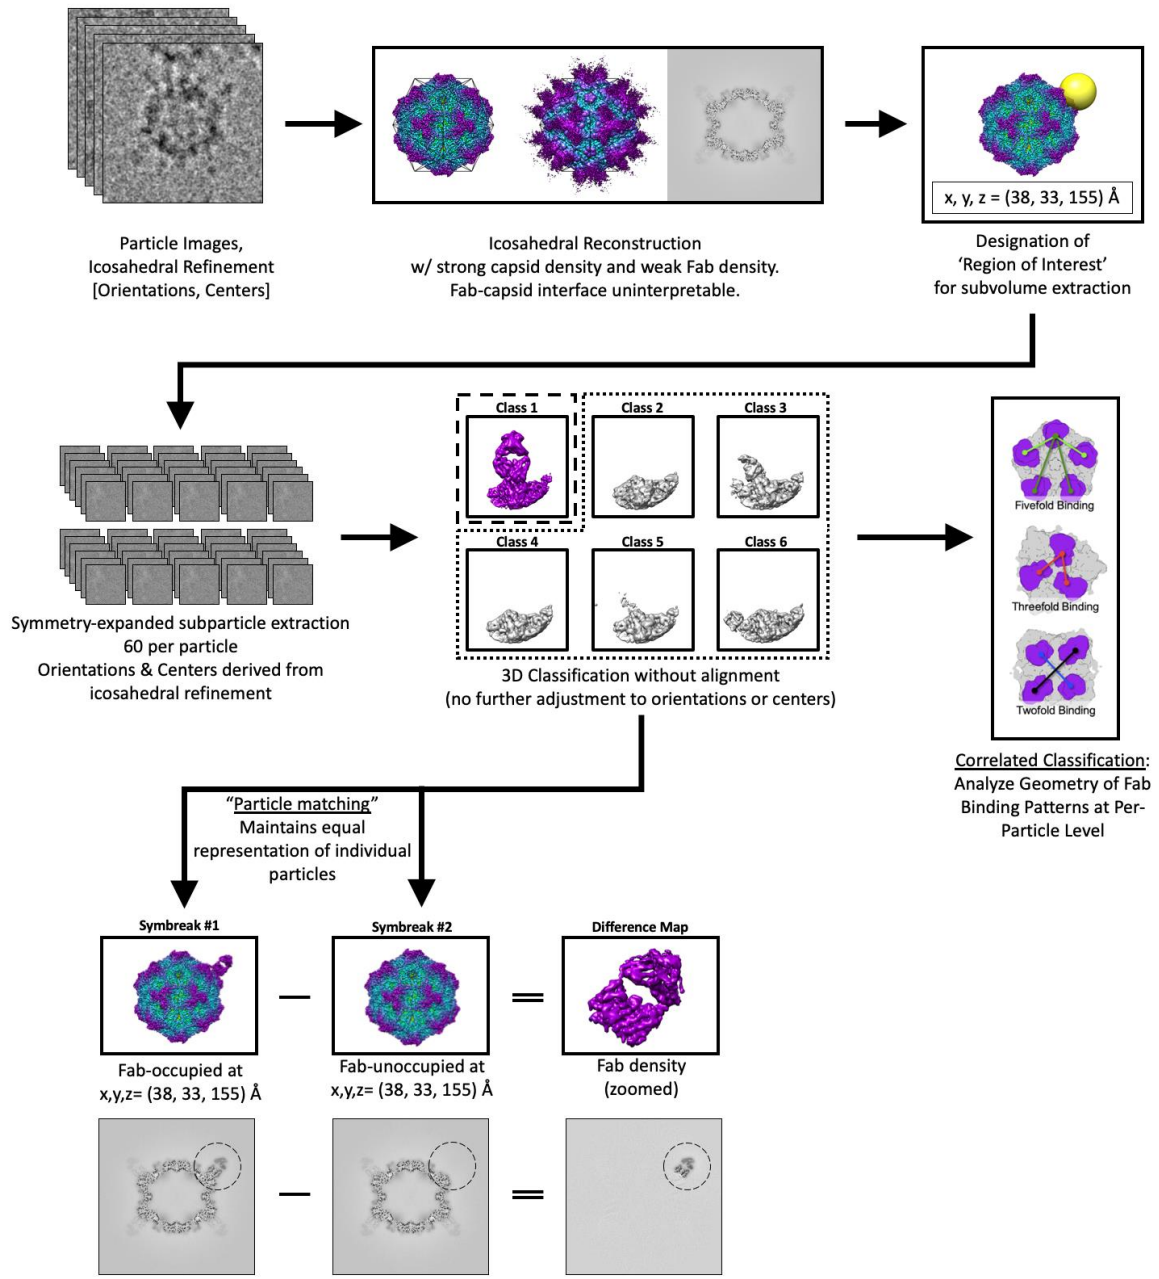

Fig. S1. Flow chart of the reconstruction and classification process.

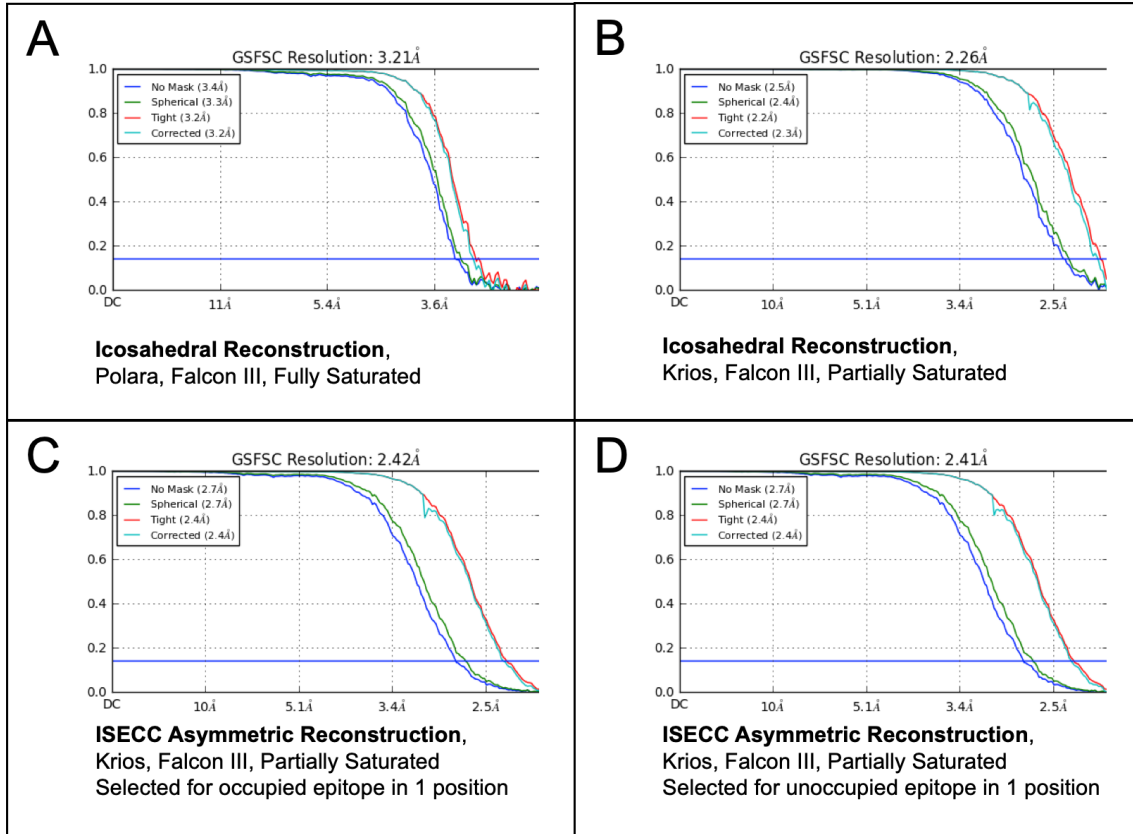

**Fig. S2. Global FSC curves.** (A, B) Different instrumentation and sample preparations allowed the partially saturated dataset to achieve higher resolution than the fully saturated dataset (2.3Å vs 3.2Å). (C,D) Asymmetric symmetry-break operations sacrificed some of this resolution to resolve the capsid with selected site either in the presence or absence of Fab (both 2.4Å global resolution). Local resolution at the selected epitope is shown in Fig. 4.

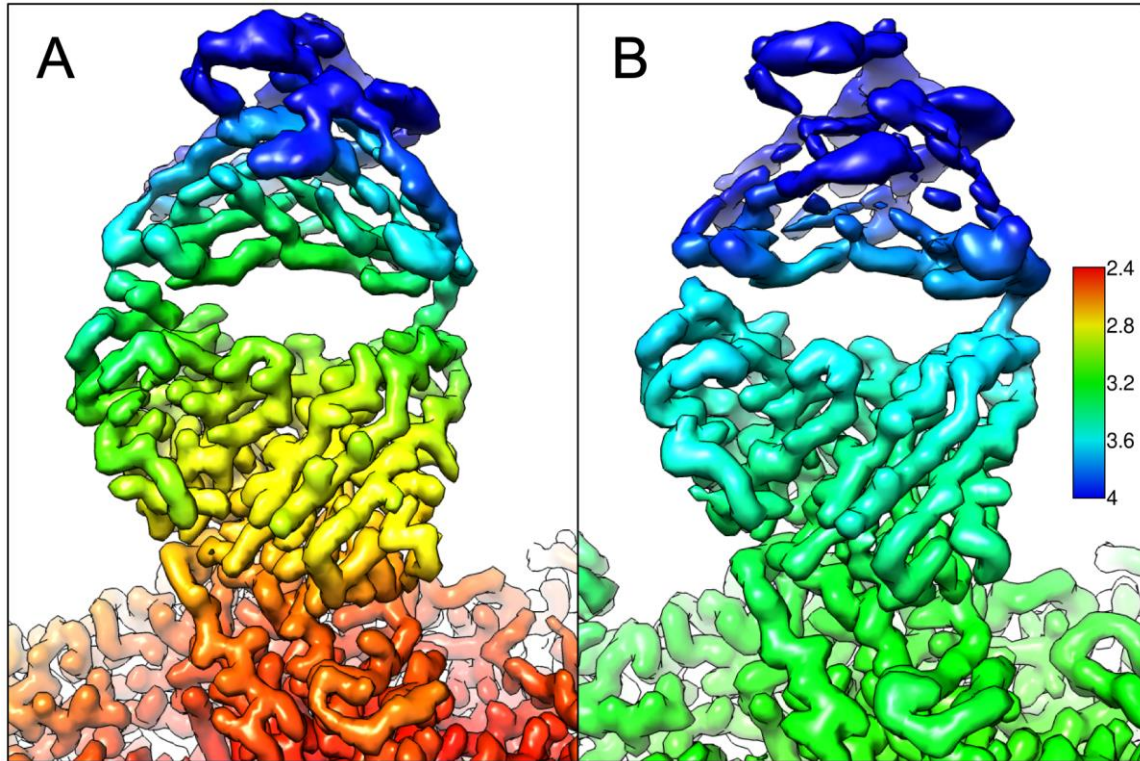

**Fig. S3. Comparison of whole Fab structures.** Fab-density of the asymmetric low-Fab map colored by local resolution (A, left) was consistently better at the Fab-capsid interface than that of the full-fab icosahedrally averaged map (B, right).

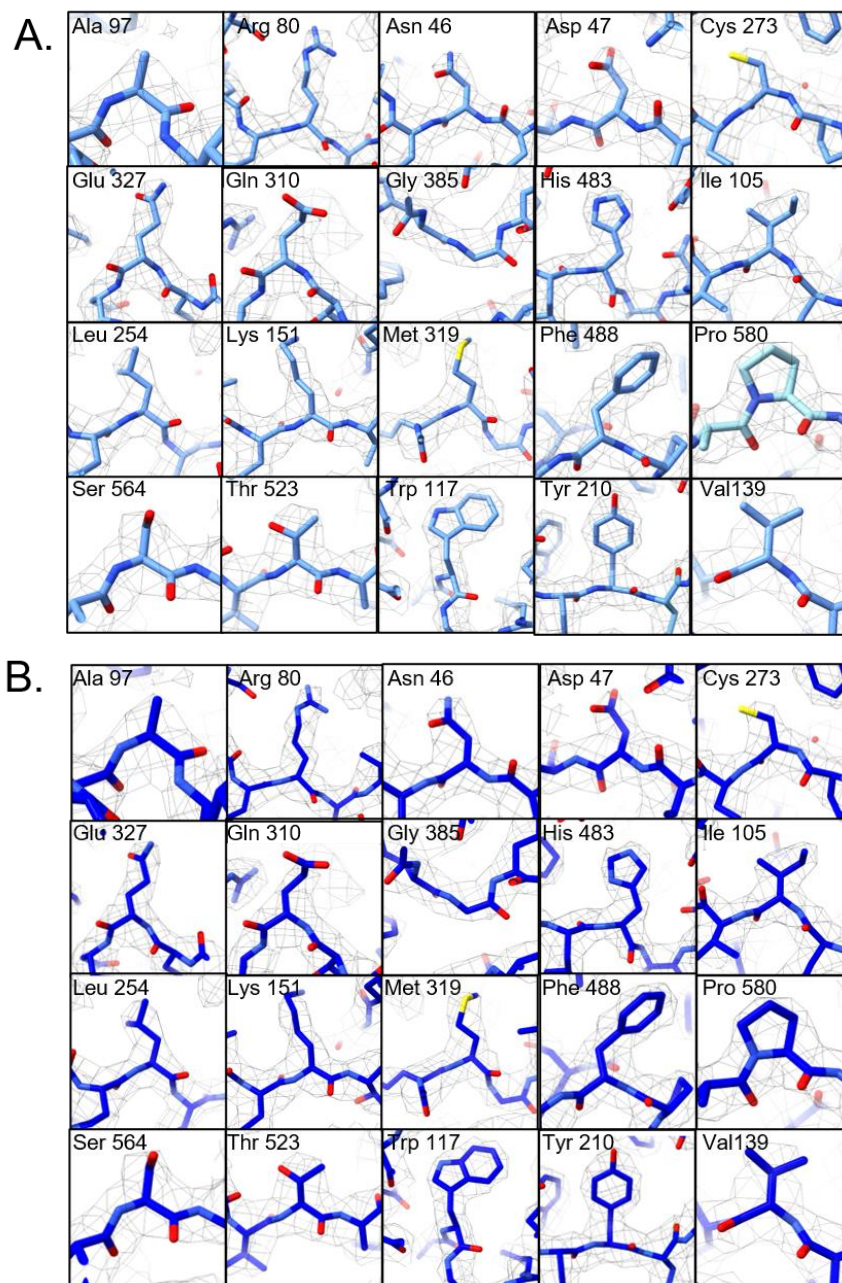

**Fig. S4. Illustration of side chain densities to highlight map quality.** Representative areas are shown for A) Fab unbound (light blue) and B) Fab bound (dark blue) capsid maps at 2.4Å resolution.

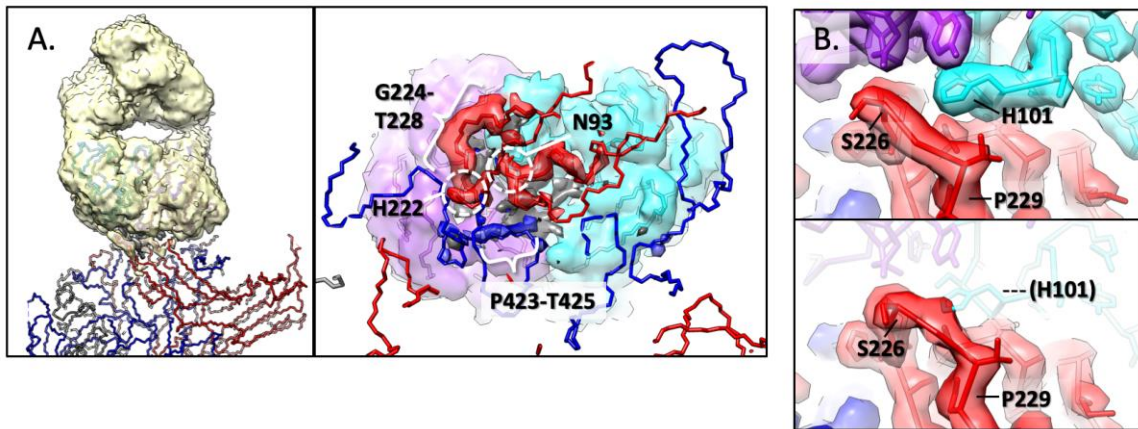

**Fig. S5. Positive and negative difference mapping in the Fab-virus interface.**

(A, Left) Difference map between occupied and unoccupied asymmetric maps (Figure 1) shows all positive density (taupe) most of which corresponds to Fab14. Two symmetry related copies of the VP2 capsid protein (red and blue wire) comprise the binding site. (Right) The same difference map is rotated 90° with the virus slabbed to show the interface from the virus surface looking outward visualizing positive difference density of the Fab heavy (cyan) and light chains (purple). This zoomed view illustrates additional positive difference density (red and blue) corresponding to the virus loops. The positive difference density corresponds to capsid residues 88-94, 222, 224-228, and 423-425 (colored by nearest chain, denoted by white brackets and circles). Negative difference density (dark grey) can be seen adjacent to the positive difference density, suggesting loop movement. (B) Zoomed image of the virus (red and blue) and Fab (purple and cyan) interface in the region of the 225 loop and H101. The VP2 228 loop is displaced by a maximum of 1.9Å upon interaction with Fab heavy chain residue H101 (top vs bottom). This same view is provided as a morph-map in S.Movie 2.

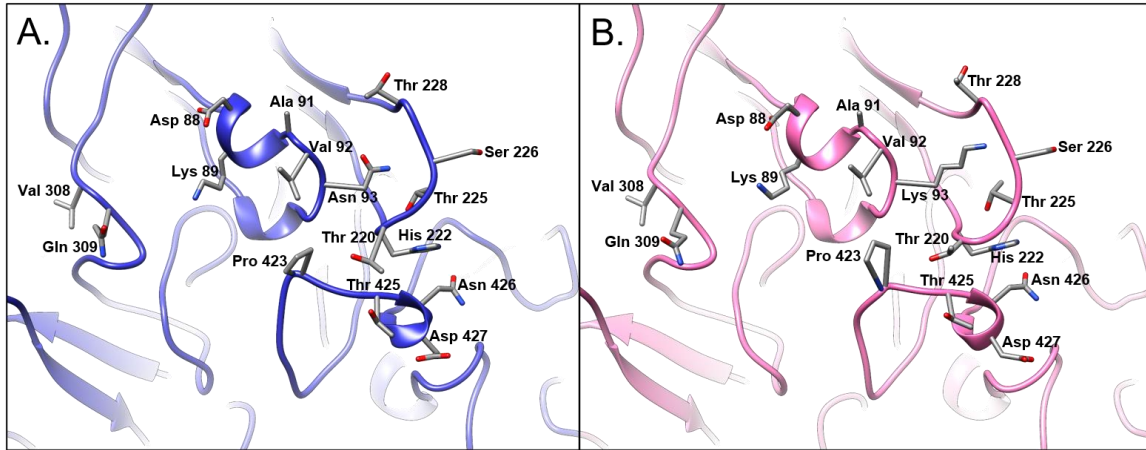

**Fig. S6. Comparison of CPV and FPV at Fab14 antibody binding site.** A) Fab14 antibody binding site on CPV crystal structure colored in blue, binding site residues colored by element (PDB: 2CAS). B) Fab 14 antibody binding site on FPV crystal structure colored in pink, binding site residues colored by element (PDB: 1C8F). Both oriented as in Fig. 2 A,B right for direct comparison to cryo EM structures.

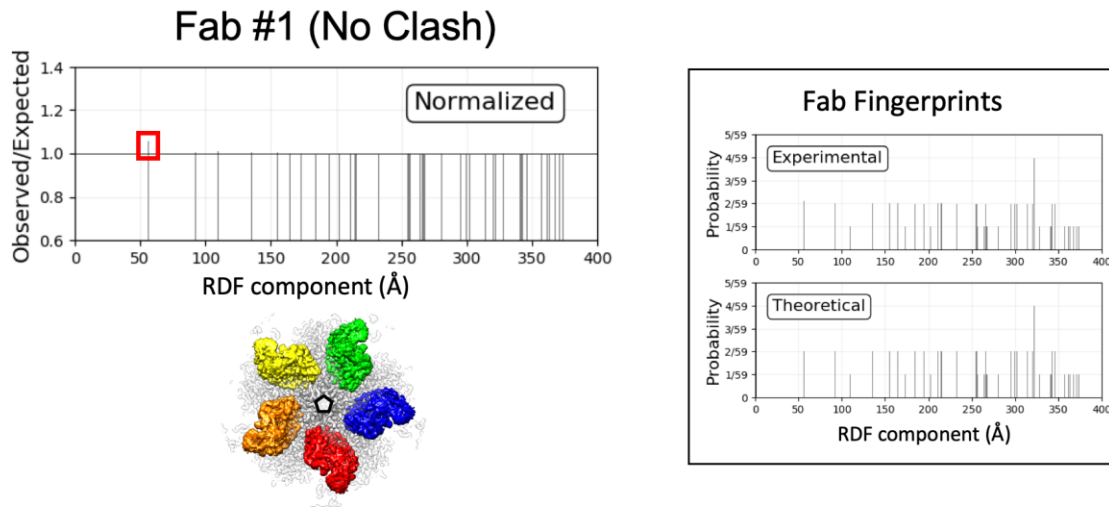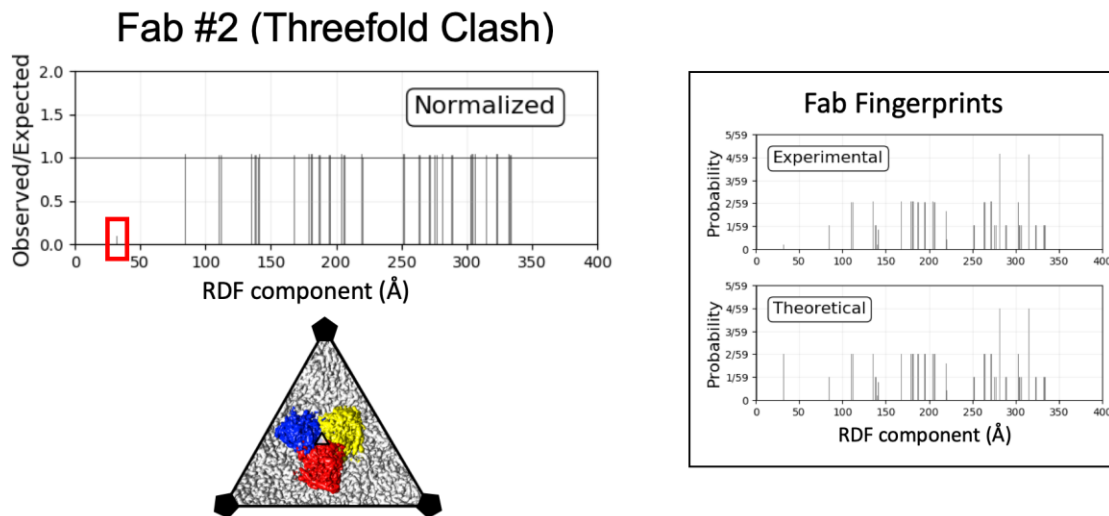

**Fig. S7. Further validation of RDFs for clash analysis.** Two undersaturated enterovirus-Fab complexes are shown to demonstrate the impact of Fab binding geometry on cooperativity via RDF analysis. Fab #1 features no symmetry clash, with the closest interaction being the fivefold relationship (top panel, Fab shown in red, orange, yellow, green, blue). Fab #2 features strong symmetry clash across the threefold symmetry axis (bottom panel, Fab shown in red, blue, yellow). The behavior of Fab #1 largely matched CPV-Fab 14, with a slight excess of the most proximal RDF component. Consistent with steric clash, the behavior of Fab #2 matched that of CPV-FabE.

Enterovirus-Fab structures and corresponding biological analysis will be published separately. They are shown as further validation of Fab fingerprints in assessing binding cooperativity.



**Table S1. Cryo-EM statistics**

| Fab Occupancy             | Symmetry                     | Microscope /Detector          | No. of micrographs | Defocus range (u.m.) | No. of particles selected | No. of particles used                              | Resolution (Å) |
|---------------------------|------------------------------|-------------------------------|--------------------|----------------------|---------------------------|----------------------------------------------------|----------------|
| Full-Fab<br>60 Fab/capsid | I2                           | FEI Polara,<br>Falcon<br>3EC  | 21,075             | 0.5 –<br>4.2         | 142,618                   | 95,353                                             | 3.2            |
| Low-Fab<br>10 Fab/capsid  | I2                           | Titan Krios,<br>Falcon<br>3EC | 2,265              | 0.7 –<br>4.9         | 316,808                   | 162,627                                            | 2.3            |
|                           | C1/<br>Symmetry<br>-mismatch | Titan Krios,<br>Falcon<br>3EC | 2,265              | 0.7 –<br>4.9         | 316,808                   | 162,627<br>* 10.2<br>orientati<br>ons/parti<br>cle | 2.4            |

**Table S2.** Sequence of the Fab and ScFv

**Light Chain**

DIVMTQSHKFMSTSVGDRVSITCKASQDVNTALAWYQQIPGQSPKLLIYSASNRYTGVPDRFTASGSGTDFTFTISSVQAEDLALYYCQQHYITPWTE  
GGGKLEIKRA---

**L1**

**L2**

**L3**

**Heavy Chain**

---  
GTELVKPGASAGVKLSCKASGYTFTNYDMNWVRQRPEQGLEWIGWIFPGDGSTRYNEKFKGKATLTTDKSSSTAYQLNRLTSEDSAVYFCARRGSH  
GSYSFAYWGQGTLVTS---

**H1**

**H2**

**H3**

Heavy and light chain sequences reported in one letter code with the chain loops underlined and designated. Yellow highlighted residues were identified as contacts with the virus surface in the 2.4 Å map.

**Table S3.** Refinement and Validation Statistics**(a) Asymmetric Refinement: Fab-occupied epitope**

|                      | VP2        | Fab 14 |
|----------------------|------------|--------|
| <b>Refinement</b>    |            |        |
| Model composition    | Capsid asu | Fab    |
| Non-hydrogen atoms   | 4,238      | 1,766  |
| Protein residues     | 532        | 227    |
| Model-to-map fit     |            |        |
| CC_mask              | 0.8121     | 0.7989 |
| R.m.s. deviations    |            |        |
| Bond lengths (Å)     | 0.0054     | 0.0047 |
| Bond angles (°)      | 1.01       | 1.02   |
| Validation           |            |        |
| MolProbity score     | 1.57       | 2.74   |
| Clashscore           | 3.74       | 9.82   |
| Rotamer outliers (%) | 2.58       | 8.47   |
| Ramachandran plot    |            |        |
| Favored (%)          | 97.53      | 91.03  |
| Outliers (%)         | 0.19       | 0      |

**(b) Asymmetric Refinement: Fab-unoccupied epitope**

|                      | VP2        |
|----------------------|------------|
| <b>Refinement</b>    |            |
| Model composition    | Capsid asu |
| Non-hydrogen atoms   | 4,238      |
| Protein residues     | 532        |
| Model-to-map fit     |            |
| CC_mask              | 0.8111     |
| R.m.s. deviations    |            |
| Bond lengths (Å)     | 0.0108     |
| Bond angles (°)      | 0.75       |
| Validation           |            |
| MolProbity score     | 2.14       |
| Clashscore           | 4.71       |
| Rotamer outliers (%) | 6.67       |
| Ramachandran plot    |            |
| Favored (%)          | 96.01      |
| Outliers (%)         | 0          |

**(c) Icosahedral Refinement: Low-Fab vs. Full-Fab data**

|                      | VP2 <sup>Low-Fab</sup> | VP2 <sup>Full-Fab</sup> | Fab 14 <sup>Full-Fab</sup> |
|----------------------|------------------------|-------------------------|----------------------------|
| <b>Refinement</b>    |                        |                         |                            |
| Model composition    | Capsid asu             |                         | Fab                        |
| Non-hydrogen atoms   | 4,238                  |                         | 1,766                      |
| Protein residues     | 532                    |                         | 227                        |
| Model-to-map fit     |                        |                         |                            |
| CC_mask              | 0.7831                 | 0.8545                  | 0.7162                     |
| R.m.s. deviations    |                        |                         |                            |
| Bond lengths (Å)     | 0.0050                 | 0.010                   | 0.008                      |
| Bond angles (°)      | 0.99                   | 1.25                    | 1.17                       |
| Validation           |                        |                         |                            |
| MolProbity score     | 1.72                   | 1.81                    | 1.96                       |
| Clashscore           | 4.35                   | 5.53                    | 6.93                       |
| Rotamer outliers (%) | 3.44                   | 0.21                    | 0.53                       |
| Ramachandran plot    |                        |                         |                            |
| Favored (%)          | 97.53                  | 91.21                   | 88.79                      |
| Outliers (%)         | 0                      | 0.37                    | 0                          |

*All statistics generated via phenix.molprobity on phenix/1.14*

**Movie S1 (separate file). Occupied-Unoccupied epitope morph map.** Morphing between the two particle-matched asymmetric maps suggests subtle hinging of the 228 loop on VP2. Key residues in the Fab 14 binding footprint are labeled. The Fab density was segmented away to provide this top-down view of the epitope. For side view, density is colored as in S.Fig. 4.

**Movie S2 (separate file). Occupied-Unoccupied epitope morph map with Fab.** Side view of morphing between the two particle-matched asymmetric maps suggests subtle hinging of the 228 loop on VP2., density is colored as in S.Fig. 4.
